# Supplementary material for: The thioesterase APT1 is a bidirectional-adjustment redox sensor
Source: Springer Nature journal article supplement (doi:10.1038/s41467-023-38464-y), 2023-05-17
Supplement: MOESM1 [file 41467_2023_38464_MOESM1_ESM.pdf]

**Title: Thioesterase APT1 is a bidirectional adjustment redox sensor**

## 2 Supplementary Fig. 1

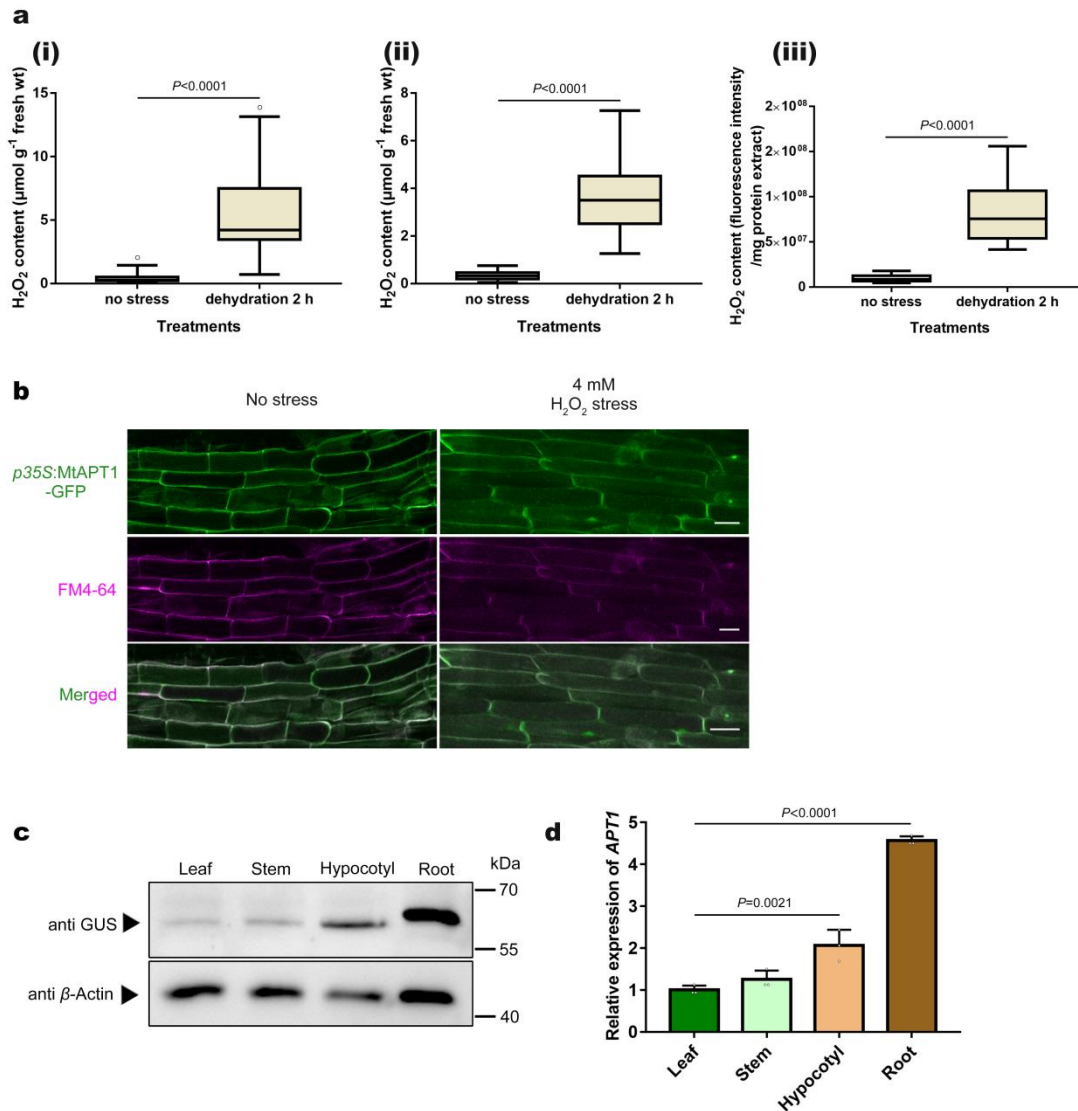

3  
4 **a** Differences in the  $\text{H}_2\text{O}_2$  content in 2-week-old seedling roots of wild-type *Medicago*  
5 R108 before and after drought (dehydration) stress for 2 h simulated by 50% PEG-8000,  
6 detected by using titanium sulfate (i), trichloroacetic acid (ii) and CM- $\text{H}_2\text{DCFDA}$  (iii)  
7 (i, ii, n=30; iii, n=29).  $P$  values were two-sided Student's t test. Center lines show the  
8 medians; box limits indicate the 25th and 75th percentiles as determined by R software;  
9 whiskers extend 1.5 times the interquartile range from the 25th and 75th percentiles,  
10 outliers are represented by dots. Box plot statistics: 1a, no stress, upper whisker 0.81,  
11 3rd quartile 0.50, median 0.25, 1st quartile 0.20, lower whisker 0.16; dehydration 2 h,  
12 upper whisker 12.68, 3rd quartile 7.29, median 4.21, 1st quartile 3.50, lower whisker  
13 0.72. 1b, no stress, upper whisker 0.76, 3rd quartile 0.45, median 0.32, 1st quartile 0.20,  
14 lower whisker 0.05; dehydration 2 h, upper whisker 7.27, 3rd quartile 4.44, median 3.51,  
15 1st quartile 2.54, lower whisker 1.26. 1c, no stress, upper whisker 17944522, 3rd  
16 quartile 11605861, median 8429642, 1st quartile 6675196, lower whisker 4562714;  
17 dehydration 2 h, upper whisker 155675248, 3rd quartile 99273325, median 75504830,  
18 1st quartile 55333584, lower whisker 41466035. Source data are provided as a Source

19 Data file.

20 **b** Confocal images of transgenic *M. truncatula* roots expressing APT1-GFP fusion  
21 proteins driven by the constitutive CaMV 35S promoter in the *apt1* mutant under  
22 normal or 4 mM H<sub>2</sub>O<sub>2</sub> stress conditions for 30 min. FM4-64 was used to label the  
23 cytoplasmic membrane and excited at a wavelength of 546 nm. Bars = 20 µm.

24 **c** Detection of tissue-specific expression by SDS–PAGE and Western blotting analyses  
25 of various tissues of transgenic *M. truncatula* expressing GUS proteins driven by the  
26 constitutive APT1 promoter (2.0 kb).

27 **d** Relative expression of the *MtAPT1* gene in different tissues of the WT. The mean  
28 values and SEs were calculated from three independent replicates. *P* values were two-  
29 sided nonparametric one-way ANOVA and Tukey’s multiple range test. Other lines  
30 were no significance with WT.

31 The source data are provided as a Source Data file.

32

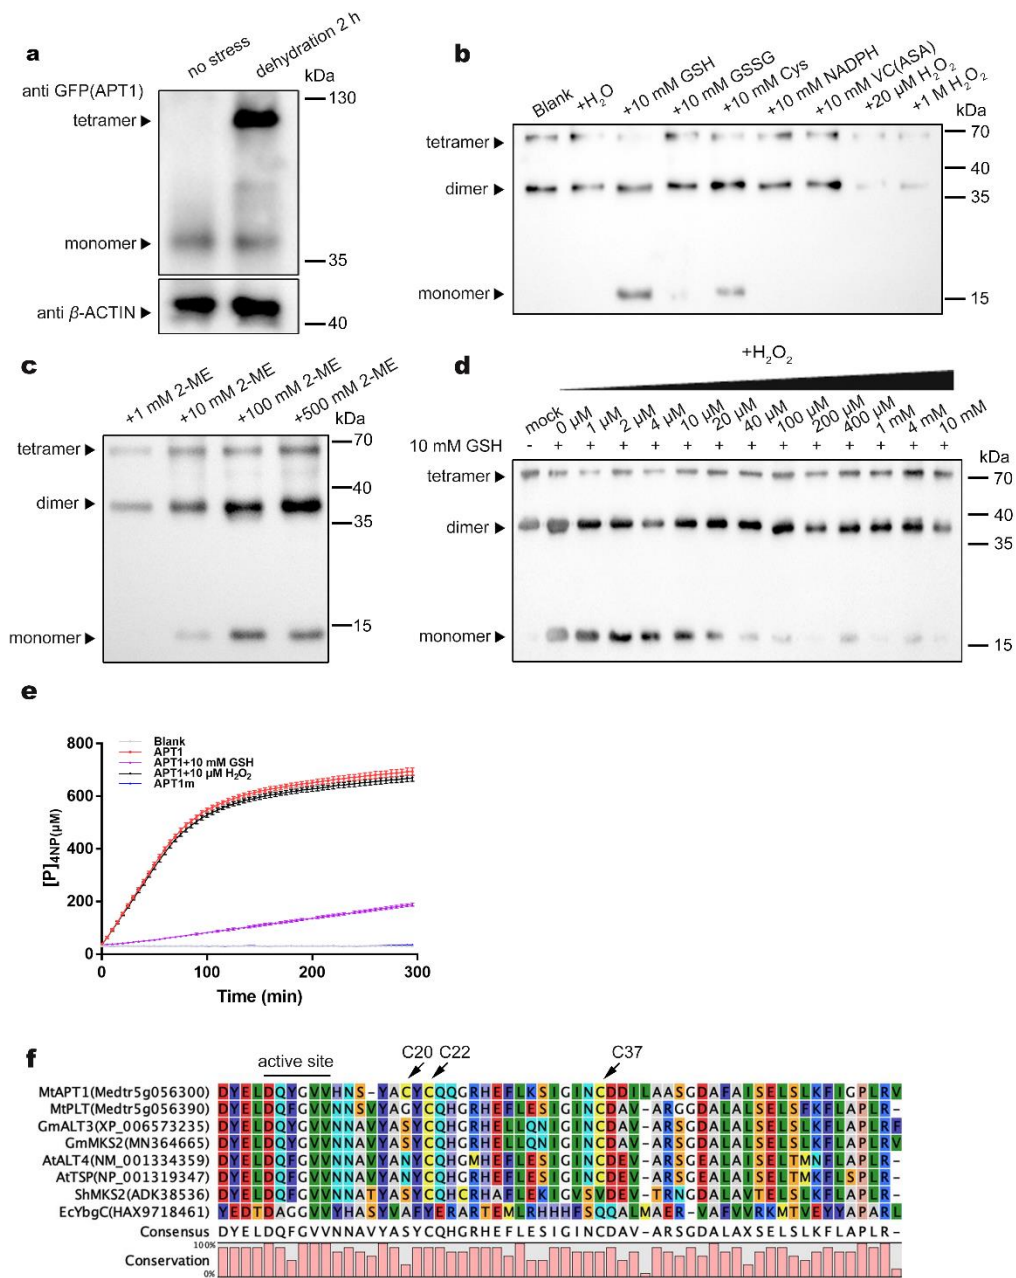

34

35 **a** Western blotting of transgenic *M. truncatula apt1* roots expressing APT1-GFP fusion  
36 protein separated on nonreducing SDS-PAGE gels showed APT1 multimerization  
37 under no stress and dehydration treatment simulated with 50% PEG-8000.

38 **b** Western blotting of the 6xHis-APT1 fusion protein separated on nonreducing SDS-  
39 PAGE gels after purification (from *E. coli*.) treated with different oxidizing and  
40 reducing agents.

41 **c** Western blotting of the 6xHis-APT1 fusion protein separated on nonreducing SDS-  
42 PAGE gels after purification by using different concentrations of 2-ME.

43 **d** Western blotting of the 6xHis-APT1 fusion protein separated on nonreducing SDS-  
44 PAGE gels after different treatments. APT1 (same amount of protein) appeared as  
45 monomers after treatment with 10 mM GSH, but further treatment with H<sub>2</sub>O<sub>2</sub> (0  $\mu$ M, 1

46  $\mu\text{M}$ , 2  $\mu\text{M}$ , 4  $\mu\text{M}$ , 10  $\mu\text{M}$ , 20  $\mu\text{M}$ , 40  $\mu\text{M}$ , 100  $\mu\text{M}$ , 200  $\mu\text{M}$ , 400  $\mu\text{M}$ , 1 mM, 4 mM and  
47 10 mM) promoted APT1 remultimerization at different levels.

48 **e** Enzymatic reaction progress curve for APT1, APT1+10 mM GSH, APT1+10  $\mu\text{M}$   
49  $\text{H}_2\text{O}_2$ , and APT1m (enzyme with a mutation in the active site, DXXGXV mutated to  
50 AXXAXA) within 300 min. The results are expressed as the concentration of the  
51 product 4-nitrophenolate. The mean values and SEs were calculated from six  
52 independent replicates (protein samples with GSH or  $\text{H}_2\text{O}_2$  or blank).

53 **f** Amino acid sequence analysis of MtAPT1 compared with highly homologous genes  
54 from other species, including *Glycine max*, *Arabidopsis thaliana*, *Solanum*  
55 *habrochaites* and *Escherichia coli*.

56 The source data are provided as a Source Data file.

57

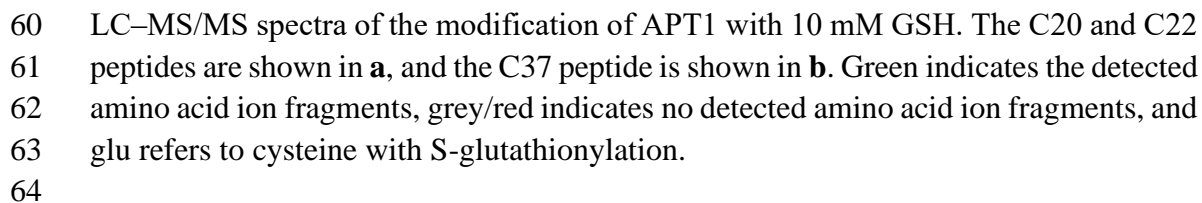

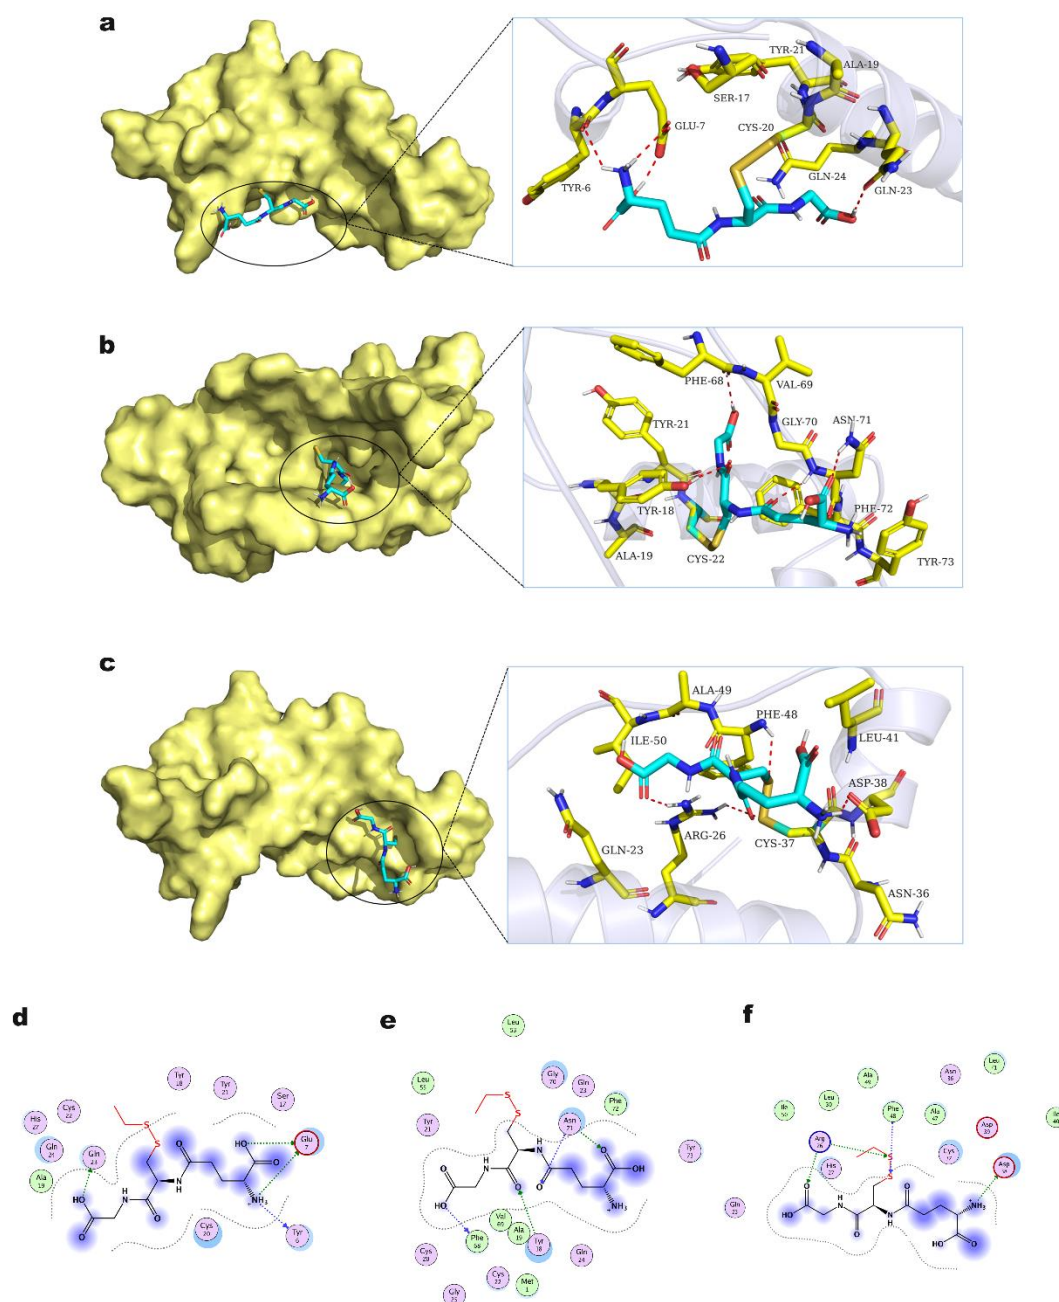

66  
 67 Binding model of GSH on the molecular surface of C20, C22, and C37 of APT1 in  
 68 three dimensions determined by molecular docking. GSH is coloured cyan, and the  
 69 molecular surfaces of C20 (**a**), C22 (**b**), and C37 (**c**) of APT1 are coloured pale yellow.  
 70 In the magnified view, GSH is coloured cyan, the surrounding residues in the binding  
 71 pockets are coloured yellow, and the backbone of the receptor is depicted as a white  
 72 cartoon with transparency. **d**, **e**, and **f** show the two-dimensional models of **a**, **b**, and **c**,  
 73 respectively.  
 74



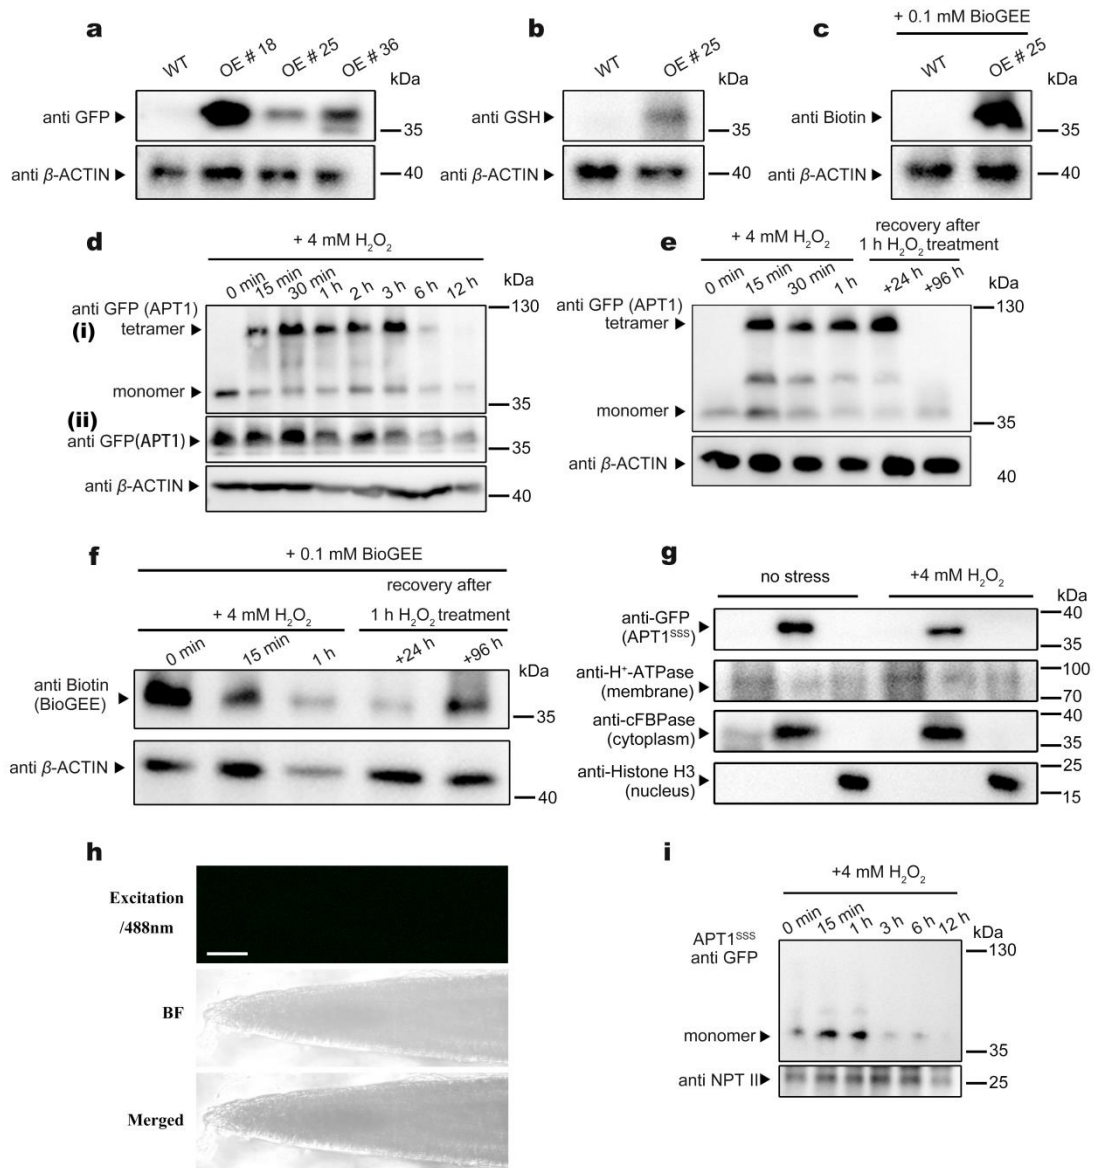

76  
77 Immunoblotting of the *APT-GFP-overexpressing* stable transgenic lines #18, #25 and  
78 #36 with GFP antibody (a), GSH antibody (b), and biotin antibody (c).

79 d Western blot of proteins separated on nonreducing SDS-PAGE gels showed APT1-  
80 GFP fusion protein multimerization and demultimerization in transgenic *M. truncatula*  
81 *apt1* roots exposed to 4 mM H<sub>2</sub>O<sub>2</sub>; detection was performed with anti-GFP (APT1) (i)  
82 antibodies. Western blot of proteins separated on reducing SDS-PAGE gels showed  
83 APT1-GFP fusion protein degradation in transgenic *M. truncatula apt1* roots when  
84 exposed to 4 mM H<sub>2</sub>O<sub>2</sub>; detection was performed with anti-GFP (APT1) and anti-β-  
85 actin (control protein) (ii) antibodies. A i to A ii show results from the same sample  
86 with the same loading volume (10 μl).

87 e Western blot of proteins separated on nonreducing SDS-PAGE gels showed APT1-  
88 GFP fusion protein multimerization and demultimerization in transgenic *M. truncatula*  
89 *apt1* roots exposed to 4 mM H<sub>2</sub>O<sub>2</sub> and after recovery (1 h of 4 mM H<sub>2</sub>O<sub>2</sub> stress followed  
90 by 24 h of nonstressed conditions in normal hydroponic solution); detection was



performed with anti-GFP (APT1) and anti- $\beta$ -actin (control protein) antibodies, and the results showed the same sample with the same loading volume (10  $\mu$ l).

**f** Western blot of proteins separated on nonreducing SDS–PAGE gels showed APT1-GFP fusion protein multimerization, demultimerization and S-glutathionylation in transgenic *M. truncatula apt1* roots when exposed to 4 mM H<sub>2</sub>O<sub>2</sub> and after recovery; detection was performed with anti-GFP (APT1), anti-biotin and anti- $\beta$ -actin (control protein) antibodies. Biotinylated glutathione ethyl ester (BioGEE) is a cell-permeable biotinylated glutathione analogue used for the detection of S-glutathionylation reactions. Before oxidative stress, the cells were treated with 0.1 mM BioGEE for 1 h for the S-glutathionylation of labelled proteins.

**g** Western blot of separation of transgenic *M. truncatula* roots expressing APT1<sup>SSS</sup>-GFP fusion proteins driven by the constitutive CaMV 35S promoter in the *apt1* mutant in the nonstressed state or after 4 mM H<sub>2</sub>O<sub>2</sub> treatment for 30 min.

**h** Confocal images of the WT root tip with excitation at 488 nm and emission at 525 nm using the same scan parameter settings as in Fig. 4A, which was used as a negative control. Bars = 20  $\mu$ m.

**i** Western blot of proteins separated on nonreducing SDS–PAGE gels showed that the APT1<sup>SSS</sup>-GFP (C20SC22SC37S) fusion protein did not multimerize in transgenic *M. truncatula apt1* roots after 4 mM H<sub>2</sub>O<sub>2</sub> treatment; detection was performed using anti-GFP (APT1), anti- $\beta$ -actin (control protein) and anti-NPTII (kanamycin resistance, control protein of transient transgene expression) antibodies.

The source data are provided as a Source Data file.

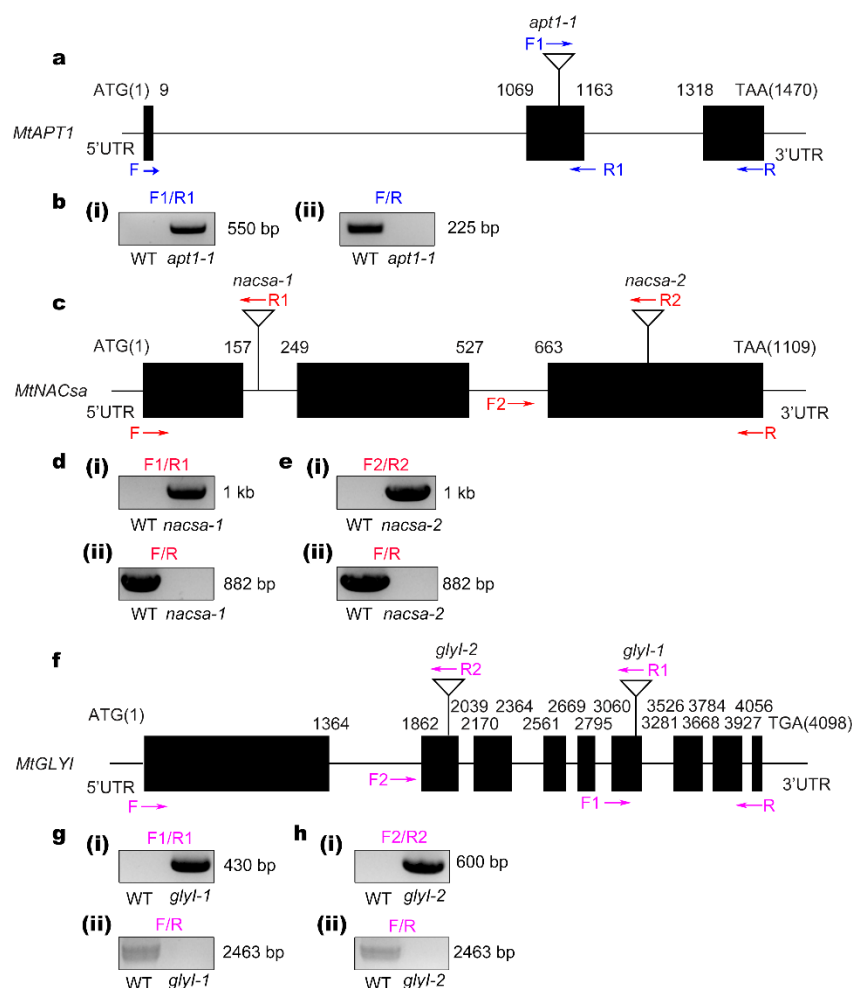

115

116 Molecular identification of *apt1*, *nacsA*, and *glyI* mutants. *MtAPT1* (a), *MtNACsa* (c),  
117 and *MtGLYI* (f) gene structure and *TntI* insertion sites. Exons are indicated by solid  
118 boxes, and introns are indicated by boldface lines. *TntI* is indicated by triangles. PCR  
119 identification of the *TntI* insertion site and homozygous lines of the *apt1-1* (b-i), *nacsA*-  
120 *1* (d-i), *nacsA*-2 (e-i), *glyI*-1 (g-i), and *glyI*-2 (h-i) mutants detected from DNA samples.  
121 PCR identification of the *TntI* insertion site and homozygous lines of the *apt1-1* (b ii),  
122 *nacsA*-1 (d-ii), *nacsA*-2 (e-ii), *glyI*-1 (g-ii), and *glyI*-2 (h-ii) mutants detected from  
123 cDNA samples. The primers used for detection are shown in different colours.

124

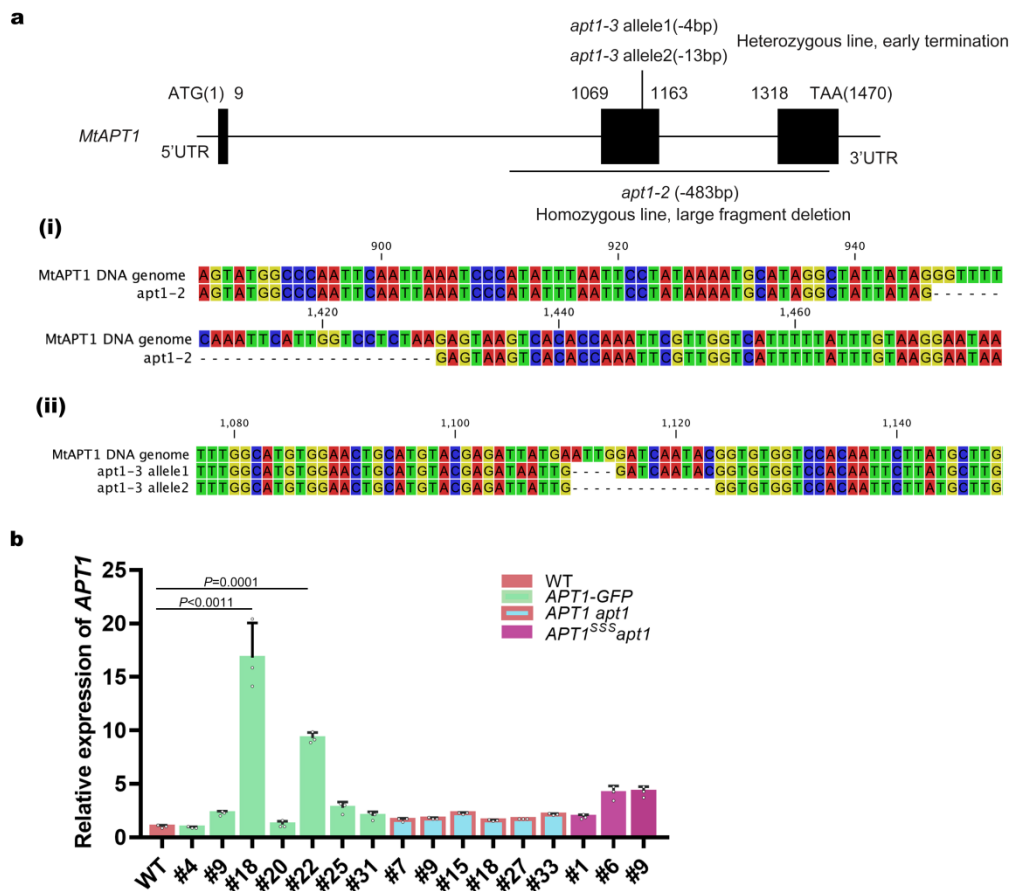

Molecular identification of *apt1-2* and *apt1-3* mutants and transgenic lines of *APT1* and *APT1*-specific tissue expression.

**a** *MtAPT1* gene structure and the base-site-deletion mutants *apt1-2* (i) and *apt1-3* (ii).

**b** Relative *MtAPT1* expression in the WT and different transgenic lines. The mean values and SEs were calculated from three technical replicates. The *p35S:APT1-GFP* stable line #25 was used to detect multimers of APT1 after oxidative stress. The *pAPT1:APT1-3×flag/apt1* stable line #7 and the *pAPT1:APT1<sup>SSS</sup>-3×flag/apt1* stable line #1 were used to detect *GLY1* expression and determine the GSH/GSSG ratio, ROS (H<sub>2</sub>O<sub>2</sub>)/GSH labelling and NBT/DAB staining. The mean values and SEs were calculated from three independent replicates. *P* values were two-sided nonparametric one-way ANOVA and Tukey's multiple range test. Other lines were no significance with WT.

The source data are provided as a Source Data file.

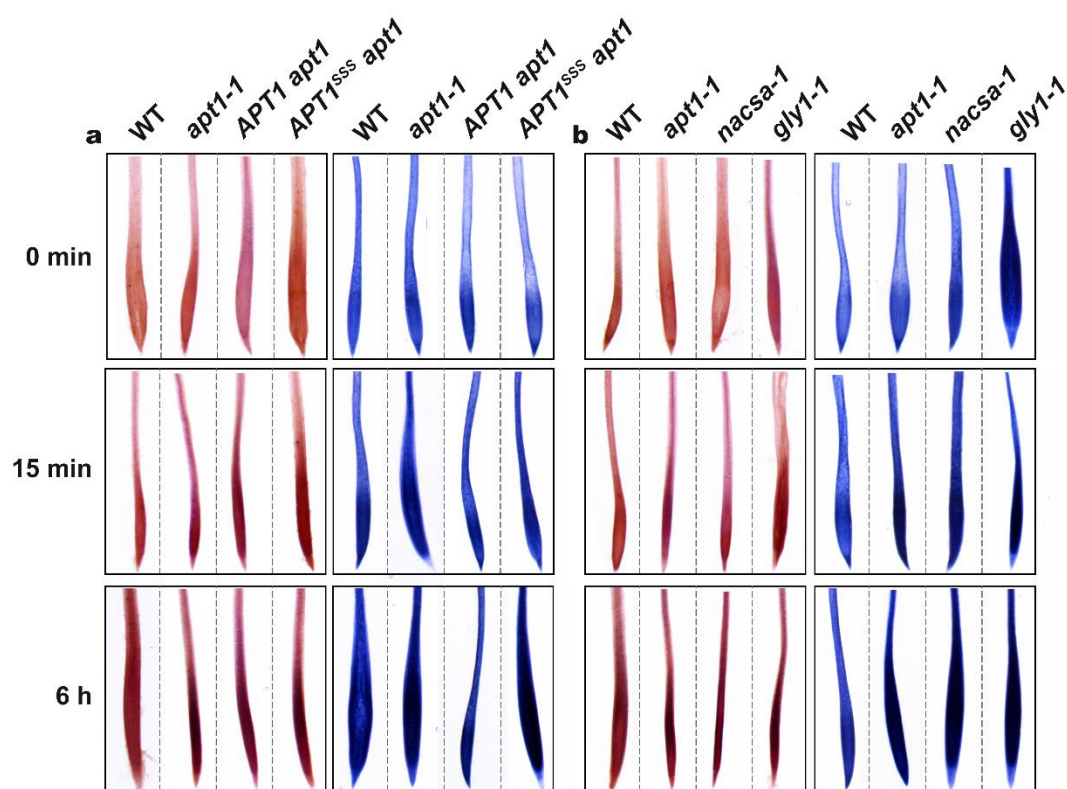

142  
 143 Multimerized APT1 transports signals through NACsa to reduce ROS accumulation.  
 144 DAB (brown) and NBT (blue) staining of WT, *apt1-1* mutant, *pAPT1:APT1-*  
 145 *3×flag/apt1* and *pAPT1:APT1<sup>SSS</sup>-3×flag/apt1* (a) and *apt1*, *nacs-1*, *gly1-1* (b) after 0 h, 15  
 146 min, and 6 h of 4 mM H<sub>2</sub>O<sub>2</sub> stress. Bars = 1 mm.  
 147

148 Supplementary Table 1. Primers used in this study.

| For real-time PCR                                 |                |                                                     |
|---------------------------------------------------|----------------|-----------------------------------------------------|
| Primer name                                       |                | Primer sequences (5'-3')                            |
| <i>MtAPT1</i>                                     | Forward primer | GTCGTCATGAATTTTTGAAAA                               |
|                                                   | Reverse primer | CTTAGAGGACCAATGAATTTG                               |
| <i>MtGLY1</i>                                     | Forward primer | ATATTGTAAAGGCGAAAGGGGGAA                            |
|                                                   | Reverse primer | CTTTTTCATAGAAGGCTATGACAC                            |
| For cloning and genotyping                        |                |                                                     |
| pCAMBIA1307- <i>MtAPT1</i> -3×FLAG                | Forward primer | TGTCGACGGATCCGCGAGCTCATGGCACCAG<br>TCGATTATGAA      |
|                                                   | Reverse primer | ATGGTCTTTGTAGTCACTAGTCAAATAAAAA<br>TTACCAACGAAT     |
| pCAMBIA1307- <i>MtAPT1</i> -GFP                   | Forward primer | TGTCGACGGATCCGCGAGCTCATGGCACCAG<br>TCGATTATGAA      |
|                                                   | Reverse primer | AGTCAGATCTACCATTCTAGACAAATAAAAA<br>TTACCAACGAAT     |
| pET30a(+)- <i>MtAPT1</i>                          | Forward primer | GGAATTCATGGCACCAGTCGATTATG                          |
|                                                   | Reverse primer | CCCAAGCTTTTACAAATAAAAATTACCAACG<br>AAT              |
| pE3025- <i>MtAPT1</i> -GFP                        | Forward primer | TCGAGCTCAAGCTTCGAATTCATGGCACCAG<br>TCGATTATGAA      |
|                                                   | Reverse primer | GGATCCCGGGCCCGCGGTACCGCAAATAAA<br>AATTACCAACGAAT    |
| pCAMBIA1381- <i>pAPT1</i> :GUS                    | Forward primer | TGGGCCCCGGCGCGCCGAATTCAGATTGGGTT<br>TACAATTAATAAT   |
|                                                   | Reverse primer | CCATGGTGGACTCCTCTTAAAGCTTCTTTTAT<br>GATCATTCTGAACCC |
| pCAMBIA1381- <i>pAPT1</i> : <i>MtAPT1</i> -3×FLAG | Forward primer | GAATGATCATAAAAGAAGCTTATGGCACCA<br>GTCGATTAT         |
|                                                   | Reverse primer | GGTGGACTCCTCTTAAAGCTTCTACTTATCG<br>TCATCGTC         |
| pCAMBIA1381- <i>pAPT1</i> : <i>MtAPT1</i> -GFP    | Forward primer | GAATGATCATAAAAGAAGCTTATGGCACCA<br>GTCGATTAT         |
|                                                   | Reverse primer | GGTGGACTCCTCTTAAAGCTTTTACTTGTAC<br>AGCTCGTCCAT      |
| <i>MtAPT1</i> -C20S (site mutant)                 | Forward primer | TCTTATGCTTCTTATTGCCAAC                              |
|                                                   | Reverse primer | GTTGGCAATAAGAAGCATAAGA                              |
| <i>MtAPT1</i> -C22S                               | Forward primer | TCTTATGCTTGTTATCCCAAC                               |
|                                                   | Reverse primer | GTTGGGAATAACAAGCATAAGA                              |
| <i>MtAPT1</i> -C37S                               | Forward primer | GGTATCAATTCTGATGATATC                               |
|                                                   | Reverse primer | GATATCATCAGAATTGATACC                               |

|                                       |                |                                                  |
|---------------------------------------|----------------|--------------------------------------------------|
| MtAPT1-C20SC22S                       | Forward primer | TCTTATGCTTCTTATTCCCAAC                           |
|                                       | Reverse primer | GTTGGGAATAAGAAGCATAAGA                           |
| NF10049 ( <i>Tnt1</i> insertion site) | Forward primer | ATCTAGTGGAGAAGCAGAGACAGTAG                       |
|                                       | Reverse primer | AACCACGACCCCGAGAGGAGCAACT                        |
| NF5250 ( <i>Tnt1</i> insertion site)  | Forward primer | ATGCAAGGTGAATTAGAATTACCAC                        |
|                                       | Reverse primer | CCAAACACATTGATGTGAGATATCAT                       |
| NF9803 ( <i>Tnt1</i> insertion site)  | Forward primer | GCAATTTGCAGCTTGATGATTGGGTG                       |
|                                       | Reverse primer | CCTCAGCTTTCATGGTATCAGGCTT                        |
| NF15130 ( <i>Tnt1</i> insertion site) | Forward primer | ACAAAGTTGGCTACCAATCCAAC                          |
|                                       | Reverse primer | AATTCTTATGCTTGTTATTGCCA                          |
| NF20885 ( <i>Tnt1</i> insertion site) | Forward primer | AATCACAACAGATGAGATTTGGATAT                       |
|                                       | Reverse primer | AACCACGACCCCGAGAGGAGCAACT                        |
| DT1-BsF- <i>MtAPT1</i> (for CRISPR)   | Forward primer | ATATATGGTCTCGATTGGAATTGGATCAATA<br>CGGTGGTT      |
| DT2-BsR- <i>MtAPT1</i>                | Reverse primer | ATTATTGGTCTCGAAACATTCATAATCTCGT<br>ACATGC        |
| DT1-F0- <i>MtAPT1</i>                 | Forward primer | TGGAATTGGATCAATACGGTGGTTTTAGAGC<br>TAGAAATAGC    |
| DT2-R0- <i>MtAPT1</i>                 | Reverse primer | AACATTCATAATCTCGTACATGCAAGCCCTG<br>CTGTTTCGTCTAG |

Supplementary Table 2. The significance of the mean value of the ROS detection fluorescence intensity for each point of Fig. 5 **c** and **d**.

| no stress                      |   |   |   |    |    |    |    |   |   |    |    |    |    |    |
|--------------------------------|---|---|---|----|----|----|----|---|---|----|----|----|----|----|
|                                | 1 | 2 | 3 | 4  | 5  | 6  | 7  | 8 | 9 | 10 | 11 | 12 | 13 | 14 |
| <b>WT</b>                      | b | a | b | c  | c  | c  | bc | a | a | a  | b  | a  | a  | a  |
| <i>apt1</i>                    | b | a | b | bc | c  | bc | c  | a | a | a  | ab | a  | a  | a  |
| <i>APT1/apt1</i>               | b | a | b | c  | bc | bc | bc | a | a | a  | ab | a  | a  | a  |
| <i>APT1<sup>SSS</sup>/apt1</i> | b | a | b | bc | bc | bc | ab | a | a | a  | a  | a  | a  | a  |
| <i>nacsa</i>                   | b | a | b | b  | b  | b  | bc | a | a | a  | ab | a  | a  | a  |
| <i>glyI</i>                    | a | a | a | a  | a  | a  | a  | a | a | a  | a  | a  | a  | a  |

| oxidative stress 15 min        |    |    |    |    |    |    |   |   |    |    |    |    |    |    |
|--------------------------------|----|----|----|----|----|----|---|---|----|----|----|----|----|----|
|                                | 1  | 2  | 3  | 4  | 5  | 6  | 7 | 8 | 9  | 10 | 11 | 12 | 13 | 14 |
| <b>WT</b>                      | b  | b  | c  | c  | b  | b  | b | b | b  | a  | b  | b  | a  | b  |
| <i>apt1</i>                    | ab | a  | a  | ab | a  | ab | a | a | ab | a  | ab | ab | a  | ab |
| <i>APT1/apt1</i>               | ab | b  | bc | c  | b  | b  | b | b | b  | a  | b  | ab | a  | b  |
| <i>APT1<sup>SSS</sup>/apt1</i> | ab | ab | ab | bc | ab | ab | a | a | ab | a  | ab | ab | a  | ab |
| <i>nacsa</i>                   | a  | ab | ab | bc | ab | a  | a | a | ab | a  | b  | ab | a  | ab |
| <i>glyI</i>                    | b  | ab | a  | a  | a  | a  | a | a | a  | a  | a  | a  | a  | a  |

The different words indicate a significant difference in different lines ( $P < 0.05$ ), which performed by two-sided nonparametric one-way ANOVA and Tukey's multiple range test.



Supplementary Table 3. The significance of the mean value of the GSH detection fluorescence intensity for each point of Fig 5 e, h, and k.

| no stress                      |   |    |   |    |   |   |    |    |    |    |     |    |    |    |
|--------------------------------|---|----|---|----|---|---|----|----|----|----|-----|----|----|----|
|                                | 1 | 2  | 3 | 4  | 5 | 6 | 7  | 8  | 9  | 10 | 11  | 12 | 13 | 14 |
| <b>WT</b>                      | a | a  | a | ab | a | a | a  | a  | a  | a  | a   | a  | a  | a  |
| <i>apt1</i>                    | a | a  | a | ab | b | a | ab | ab | bc | b  | ab  | ab | a  | ab |
| <i>APT1/apt1</i>               | a | ab | a | a  | a | a | a  | a  | b  | bc | bc  | ab | b  | c  |
| <i>APT1<sup>SSS</sup>/apt1</i> | a | ab | a | ab | a | a | a  | a  | ab | b  | bc  | b  | b  | c  |
| <i>nacsa</i>                   | a | a  | a | a  | a | a | a  | a  | bc | b  | abc | ab | a  | bc |
| <i>glyI</i>                    | b | b  | b | b  | b | b | b  | b  | c  | c  | c   | c  | b  | d  |

| oxidative stress 15 min        |   |   |   |   |    |    |   |    |   |    |    |    |    |    |
|--------------------------------|---|---|---|---|----|----|---|----|---|----|----|----|----|----|
|                                | 1 | 2 | 3 | 4 | 5  | 6  | 7 | 8  | 9 | 10 | 11 | 12 | 13 | 14 |
| <b>WT</b>                      | a | a | a | a | a  | a  | a | a  | b | a  | a  | a  | a  | a  |
| <i>apt1</i>                    | b | b | b | b | bc | bc | b | b  | c | b  | bc | cd | bc | bc |
| <i>APT1/apt1</i>               | a | a | a | a | a  | a  | a | a  | a | a  | a  | b  | a  | a  |
| <i>APT1<sup>SSS</sup>/apt1</i> | b | b | b | b | bc | bc | b | bc | c | b  | b  | c  | b  | b  |
| <i>nacsa</i>                   | b | b | b | b | b  | b  | b | c  | c | b  | bc | c  | c  | c  |
| <i>glyI</i>                    | c | c | c | c | c  | c  | b | c  | c | b  | c  | d  | c  | c  |

| recovery 24 h after oxidative stress 15 min |   |    |   |   |   |    |   |   |    |    |     |    |    |    |
|---------------------------------------------|---|----|---|---|---|----|---|---|----|----|-----|----|----|----|
|                                             | 1 | 2  | 3 | 4 | 5 | 6  | 7 | 8 | 9  | 10 | 11  | 12 | 13 | 14 |
| <b>WT</b>                                   | a | a  | a | a | a | a  | a | a | b  | ab | ab  | ab | ab | a  |
| <i>apt1</i>                                 | b | bc | b | b | b | c  | b | c | cd | c  | c   | c  | b  | a  |
| <i>APT1/apt1</i>                            | a | a  | a | a | a | ab | a | a | a  | a  | a   | a  | a  | a  |
| <i>APT1<sup>SSS</sup>/apt1</i>              | b | c  | b | b | b | c  | b | c | cd | bc | bc  | bc | ab | a  |
| <i>nacsa</i>                                | b | b  | b | b | b | bc | a | b | bc | ab | abc | ab | ab | a  |
| <i>glyI</i>                                 | b | bc | b | b | b | c  | b | c | d  | bc | c   | bc | ab | a  |

The different words indicate a significant difference in different lines ( $P < 0.05$ ), which performed by two-sided nonparametric one-way ANOVA and Tukey's multiple range test.

## Supplementary Methods

### Determination of the H<sub>2</sub>O<sub>2</sub> level by trichloroacetic acid (TCA)

One hundred milligrams of frozen plant tissue was homogenized with the addition of 1 mL of 0.1% (w/v) TCA, which was kept on ice at all times. Then, the sample was mixed well by vortexing and centrifuged at 15,000×g for 15 min at 4°C. Then, 2 mL tubes were prepared to perform the reaction by adding 0.5 mL of the supernatant and 0.5 mL of 10 mM phosphate buffer (pH 7.0). For the Blank, 0.5 mL of 0.1% (w/v) TCA was used instead of the supernatant. Then, 1 mL of potassium iodide was added to initiate the reaction as quickly as possible. The sample was mixed gently and left in the dark for 10 min. Then, 300 µL of the reaction mixture was transferred to a 96-well plate, and the absorbance at 390 nm was measured in a Multimode microplate reader (Spark®, Tecan, Switzerland). The concentration and content of hydrogen peroxide in plant tissue were calculated using a standard curve<sup>1</sup>.

### Determination of the H<sub>2</sub>O<sub>2</sub> level by CM-H<sub>2</sub>DCFDA

Control and treated tissues were harvested, and nearly 100 mg of tissue was ground in liquid nitrogen. The ground tissue powder was placed in a preweighed 2 mL tube with 1 mL of 10 mM Tris-HCl (pH 7.2). The sample was centrifuged at 12,000×g for 20 min at 4°C. Then, the supernatant was transferred to a fresh 2 mL tube. The instrument was blanked with 10 mM Tris-HCl (pH 7.2). One hundred microlitres of supernatant was diluted with 900 µL of 10 mM Tris-HCl (pH 7.2). Then, 10 µL of 1 mM CM-H<sub>2</sub>DCFDA (final concentration will be 10 µM) (C6827, Thermo) was added to the first sample, and after 1 min, 10 µL of CM-H<sub>2</sub>DCFDA was added to the next sample. The rest of the samples were vortexed and incubated in the dark for 10 min. The fluorescence values of samples treated with CM-H<sub>2</sub>DCFDA were measured by a fluorometer (RF-5301 PC, Shimadzu, Japan). The control was set by adding 100 µL of plant extract + 900 µL of Tris-HCl (pH 7.2), inverting and mixing (using parafilm), and the values were read in a fluorometer. This background fluorescence value was deducted from all readings. The protein concentration in all samples was estimated using Bradford reagent (P0010, Beyotime, China), and ROS levels are expressed as relative fluorescence units/mg of protein extract. In this experiment, to rule out doubts about CM-H<sub>2</sub>DCFDA not being completely specific to ROS, we performed measurements on equal aliquots with catalase (300 U/mL) added to one sample and repeated the measurement 6 times, subtracting the catalase-insensitive background from the experimental value<sup>2</sup>.

## Supplementary references

1. Antoniou, C., Savvides, A., Georgiadou, E.C., Fotopoulos, V. (2018). Spectrophotometric quantification of reactive oxygen, nitrogen and sulfur species in plant samples. In: Alcázar, R., Tiburcio, A. (eds) Polyamines. Methods in Molecular Biology, vol 1694. Humana Press, New York, NY. [https://doi.org/10.1007/978-1-4939-7398-9\\_16](https://doi.org/10.1007/978-1-4939-7398-9_16).
2. Jambunathan, N. (2010). Determination and detection of reactive oxygen species (ROS), lipid peroxidation, and electrolyte leakage in plants. In: Sunkar, R. (eds)

204 Plant Stress Tolerance. Methods in Molecular Biology, vol 639. Humana Press.  
205 [https://doi.org/10.1007/978-1-60761-702-0\\_18](https://doi.org/10.1007/978-1-60761-702-0_18).
